# Supplementary material for: An ultrathin Al2O3 bridging layer between CdS and ZnO boosts photocatalytic hydrogen production
Source: Royal Society of Chemistry journal article supplement (doi:10.1039/d0ta03933k), 2020-01-01
Supplement: d0ta03933k1.pdf [file d0ta03933k1.pdf]

## Electronic Supplementary Information

### Ultrathin Al<sub>2</sub>O<sub>3</sub> bridging layer between CdS and ZnO boosting photocatalytic hydrogen production

Dandan Ma,<sup>a</sup> Zhenyu Wang,<sup>a</sup> Jian-Wen Shi,<sup>\*,a</sup> Yajun Zou,<sup>a</sup> Yixuan Lv,<sup>a</sup> Xin Ji,<sup>a</sup> Zhihui Li,<sup>a</sup>

Yonghong Cheng,<sup>a</sup> Lianzhou Wang<sup>\*,b</sup>

*<sup>a</sup> State Key Laboratory of Electrical Insulation and Power Equipment, Center of Nanomaterials for Renewable Energy, School of Electrical Engineering, Xi'an Jiaotong University, Xi'an 710049, China*

*<sup>b</sup> Nanomaterials Centre, School of Chemical Engineering and AIBN, The University of Queensland, St. Lucia, Brisbane, QLD 4072, Australia*

#### Corresponding author:

Jian-Wen Shi, E-mail: [jianwen.shi@mail.xjtu.edu.cn](mailto:jianwen.shi@mail.xjtu.edu.cn)

Lianzhou Wang, E-mail: [l.wang@uq.edu.au](mailto:l.wang@uq.edu.au)

## 1. Materials

Sodium sulfide ( $\text{Na}_2\text{S}\cdot 9\text{H}_2\text{O}$ ) and cadmium acetate dihydrate ( $\text{Cd}(\text{CH}_3\text{COO})_2\cdot 2\text{H}_2\text{O}$ ) were provided by Tianjin Tianli Chemical Reagent Co., Ltd and Tianjin Guangfu Fine Chemical Research Institute, respectively.  $\text{H}_2\text{PtCl}_6$  (8 wt. % in  $\text{H}_2\text{O}$ ) was ordered from Shanghai Aladdin Bio-Chem Technology Co., Ltd, China. Sodium sulfite anhydrous ( $\text{Na}_2\text{SO}_3$ ) and sodium sulfate ( $\text{Na}_2\text{SO}_4$ ) were purchased from Sinopharm Chemical Reagent Co., Ltd. All of the reagents were used as received without further purification.

## 2. The calculation of apparent quantum efficiency (AQE)

A 300 W Xenon lamp (CEL-PF300-T8) equipped with different wavelengths cutoff filters was utilized as light sources to measure the AQE of  $\text{Cd@Al}_2\text{O}_3\text{/Zn}$ . The light intensity was obtained with an optical power meter (CEL-NP2000, CEAULIGHT, Beijing). 30 mg of sample dispersed in 20 mL of deionized water was utilized for the measurement. Taking the  $\text{H}_2$  evolution at 420 nm wavelength for example, the wavelength-dependent AQE was calculated as follows.

The measured power density of simulated sunlight at 420 nm is  $7.89 \text{ mW/cm}^2$ . After 4 h of illumination, the total incident power ( $N$ ) over the  $28.3 \text{ cm}^2$  irradiation area (3 cm radius) is:

$$N = \frac{E\lambda}{hc} = \frac{7.89 \times 10^{-3} \times 28.3 \times 3600 \times 4 \times 420 \times 10^{-9}}{6.626 \times 10^{-34} \times 3 \times 10^8} = 6.79 \times 10^{21}$$

The total evolution amount of  $\text{H}_2$  detected by gas chromatography (GC) is  $1756 \mu\text{mol}$ ,

$$\begin{aligned} QE &= \frac{2 \times \text{the number of evolved } \text{H}_2 \text{ molecules}}{\text{the number of incident photons}} \\ &= \frac{2 \times 6.02 \times 10^{23} \times 1756 \times 10^{-6}}{6.79 \times 10^{21}} = 31.14 \% \end{aligned}$$

### 3. Figures

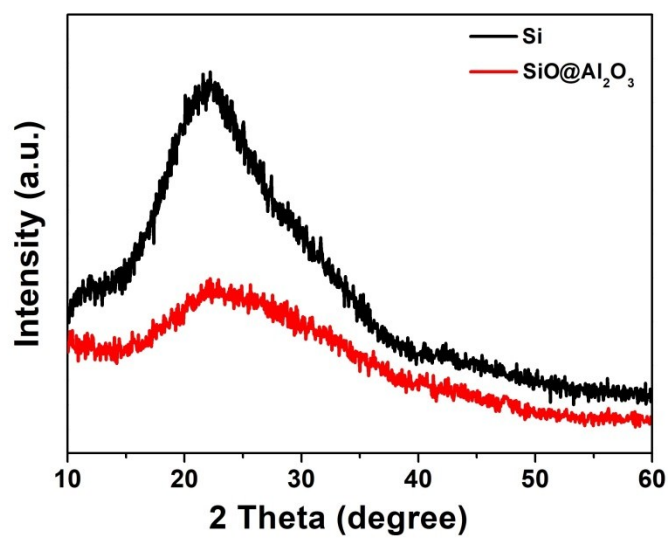

**Fig. S1.** XRD spectra of Si substrate before and after 200 cycles of Al<sub>2</sub>O<sub>3</sub> deposition.

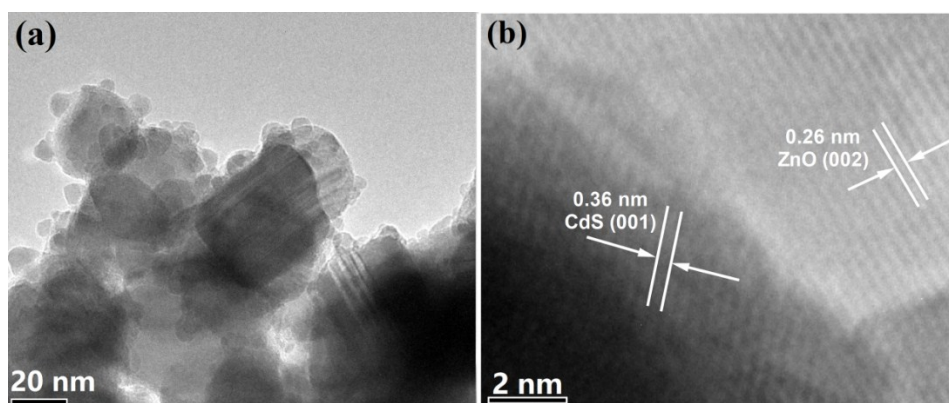

**Fig. S2.** TEM and HRTEM images of Cd@Zn.

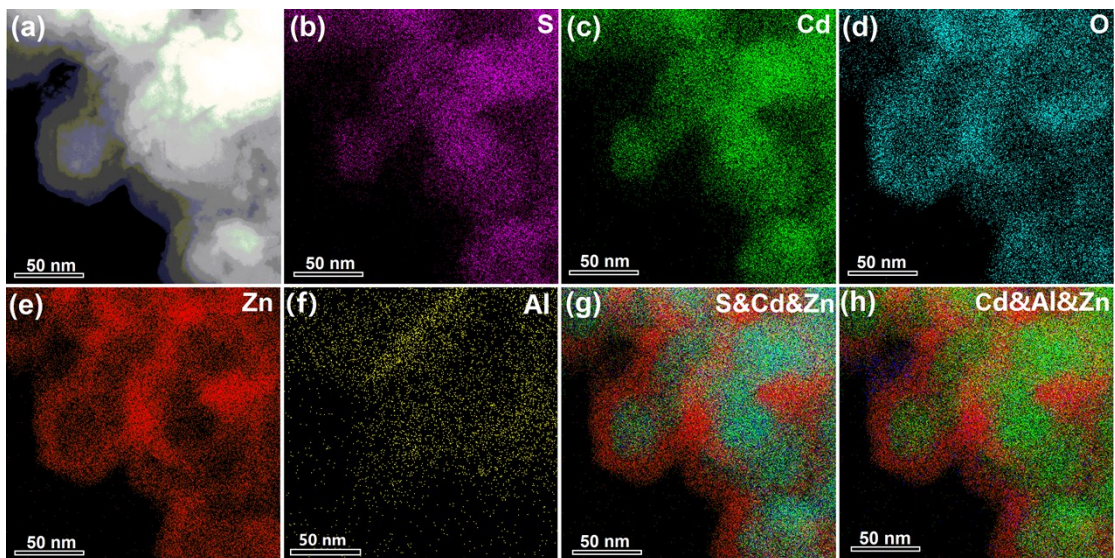

**Fig. S3.** (a) High-angle annular dark field-scanning transmission electron microscopy (HAADF-STEM) image and (b-f) element distribution mapping results of S, Cd, O, Zn and Al taken from Cd@Al<sub>10</sub>@Zn. (g) and (h) are the overlapped mapping results of S&Cd&Zn and Cd&Al&Zn, respectively.

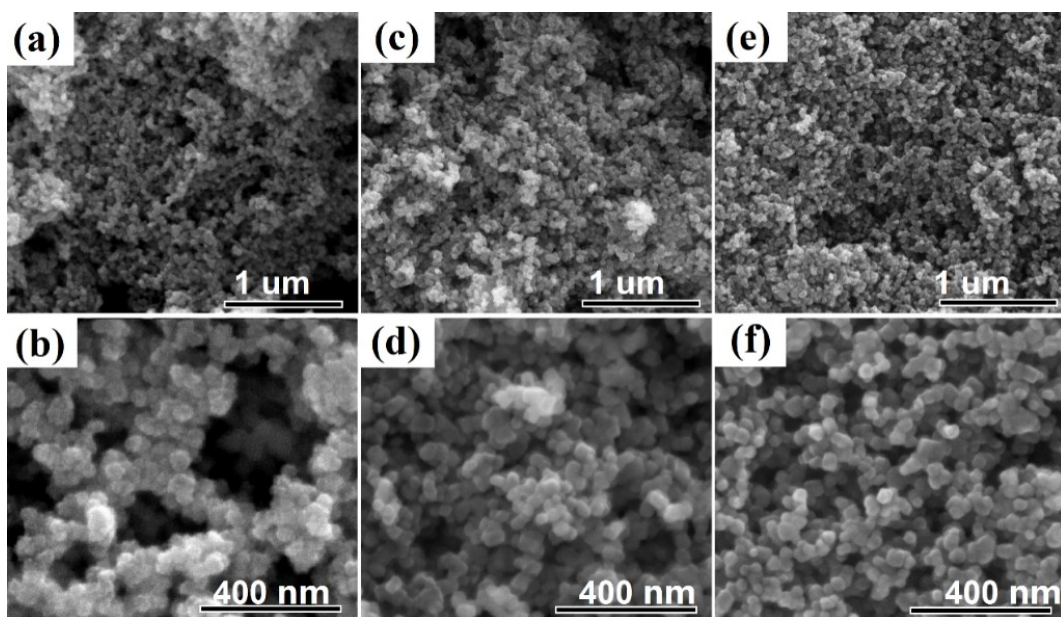

**Fig. S4.** SEM images of (a, b) Cd@Zn, (c, d) Cd@Al<sub>10</sub> and (e, f) Cd@Al<sub>10</sub>@Zn.

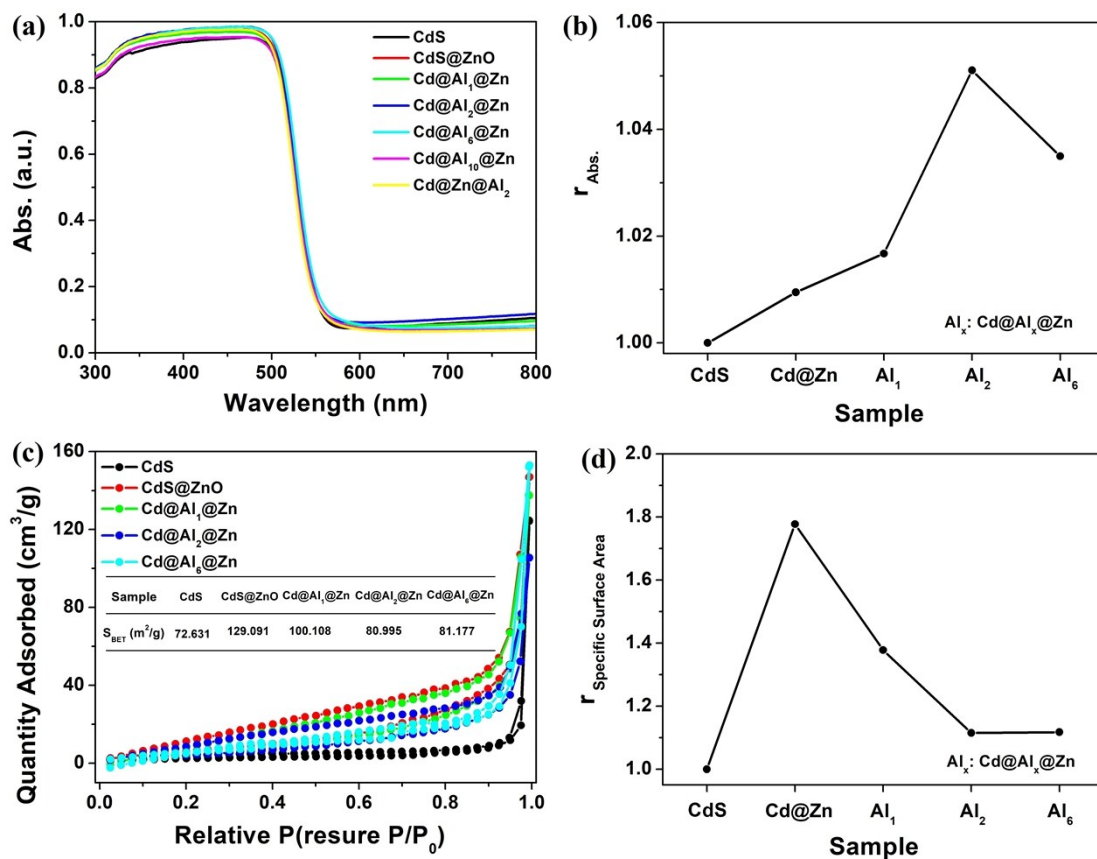

**Fig. S5.** (a) Light absorption spectra and (c) BET of the as fabricated samples. (b) and (d) are the relative light absorption ability and relative specific surface area normalized by using CdS as the referenced sample.

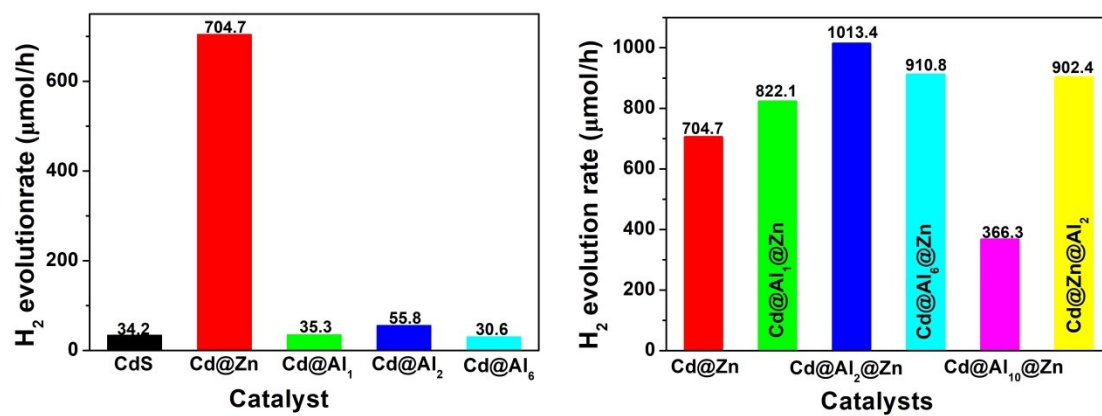

**Fig S6.** The comparison of photocatalytic H<sub>2</sub> generation rates over the as-fabricated samples, the amount of catalysts is 10 mg, all of the data were obtained without normalization.

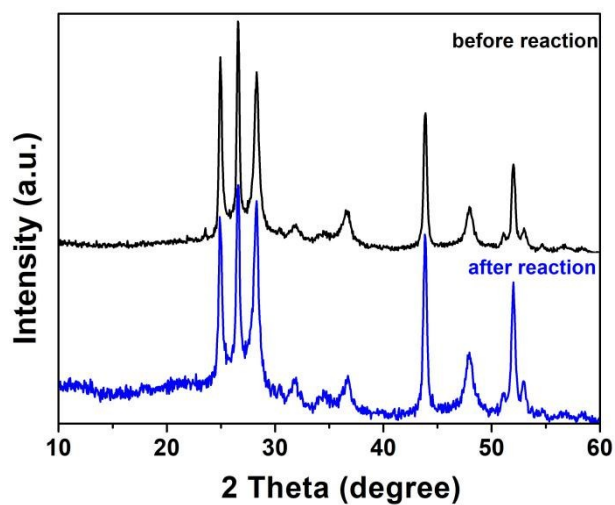

**Fig. S7.** XRD spectra of Cd@Al<sub>2</sub>@Zn before and after 20 h reaction for 4 cycles.

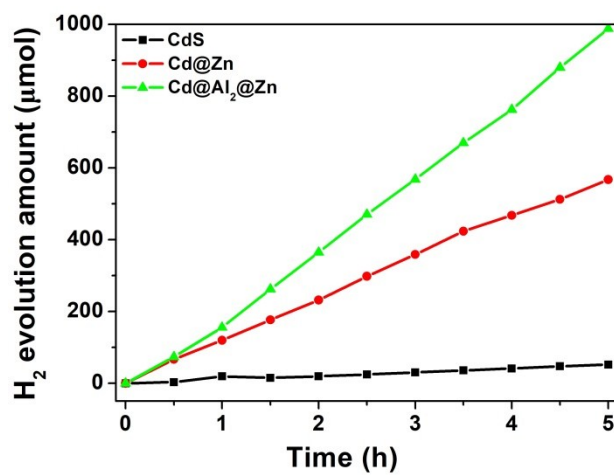

**Fig. S8.** H<sub>2</sub> evolution amount as a function of time over CdS, Cd@Zn and Cd@Al<sub>2</sub>@Zn catalysts in the absence of Pt cocatalyst.



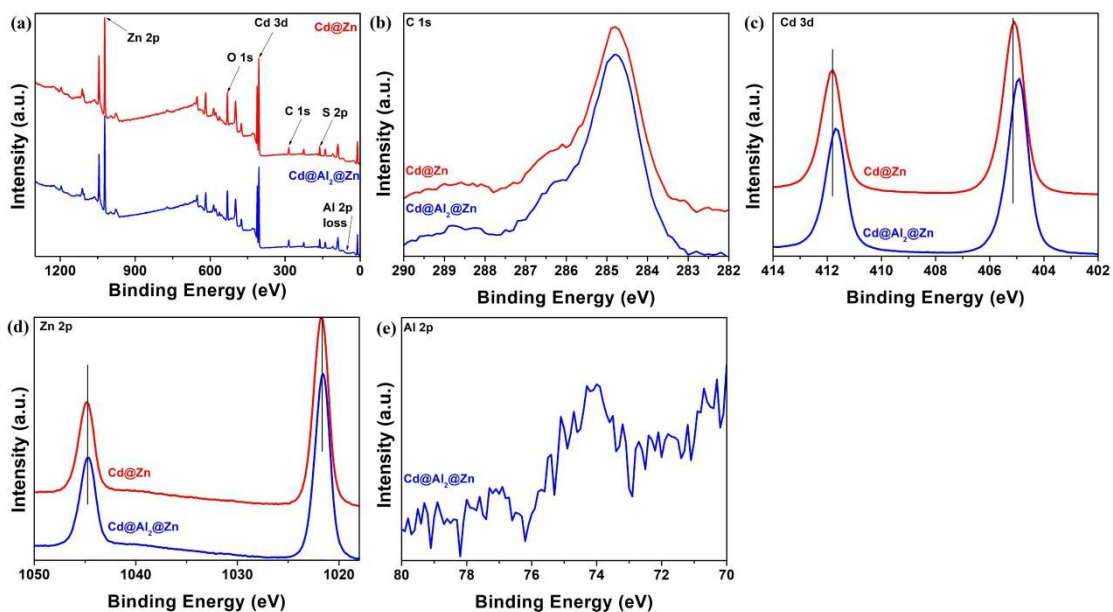

**Fig. S9.** XPS spectra of Cd@Zn and Cd@Al<sub>2</sub>@Zn : (a) Survey, (b) C 1s, (c) Cd 3d, (d) Zn 2p and (e) Al 2p.

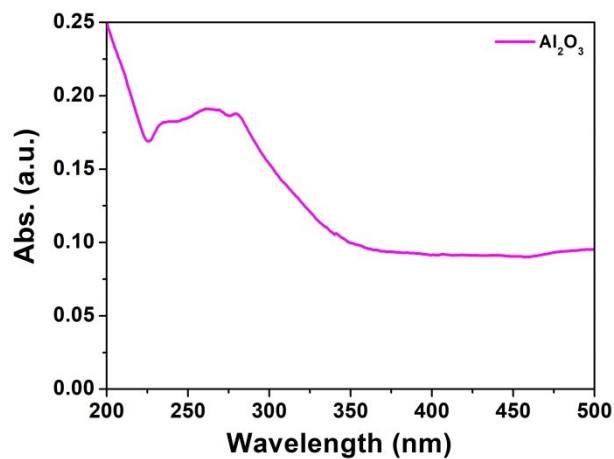

**Fig. S10.** UV-vis absorption spectrum of pure Al<sub>2</sub>O<sub>3</sub> prepared by ALD method.

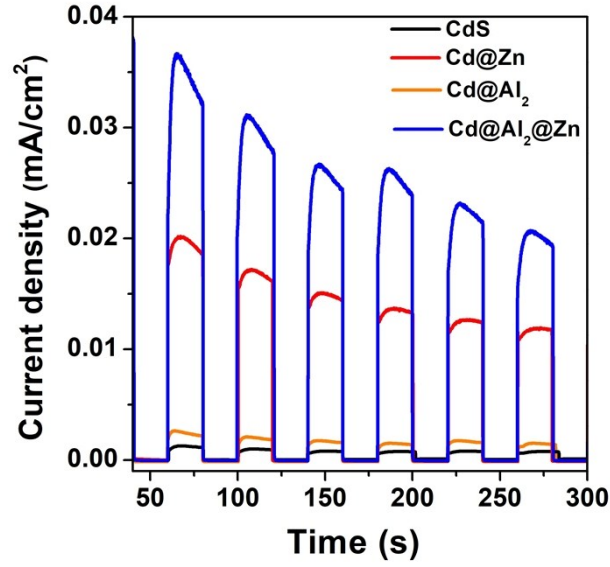

Fig. S11. (a) Photocurrent-time (i-t) curves of CdS, Cd@Zn, Cd@Al<sub>2</sub> and Cd@Al<sub>2</sub>@Zn.

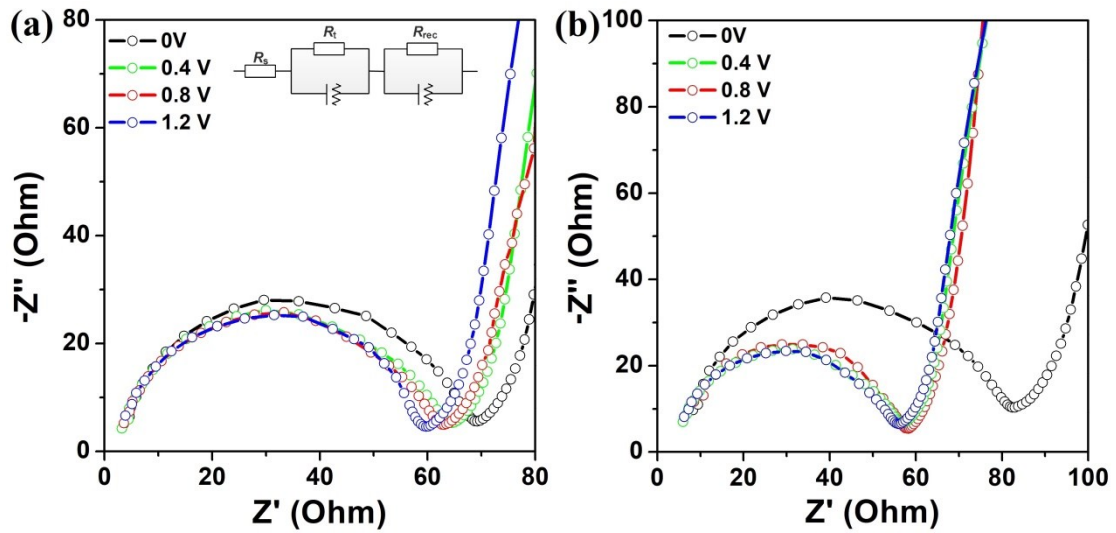

Fig. S12. EIS curves of (a) Cd@Zn and (b) Cd@Al<sub>2</sub>@Zn measured at different applied bias voltage under 300 W Xe lamp irradiation (the inset is the equivalent circuit diagram).



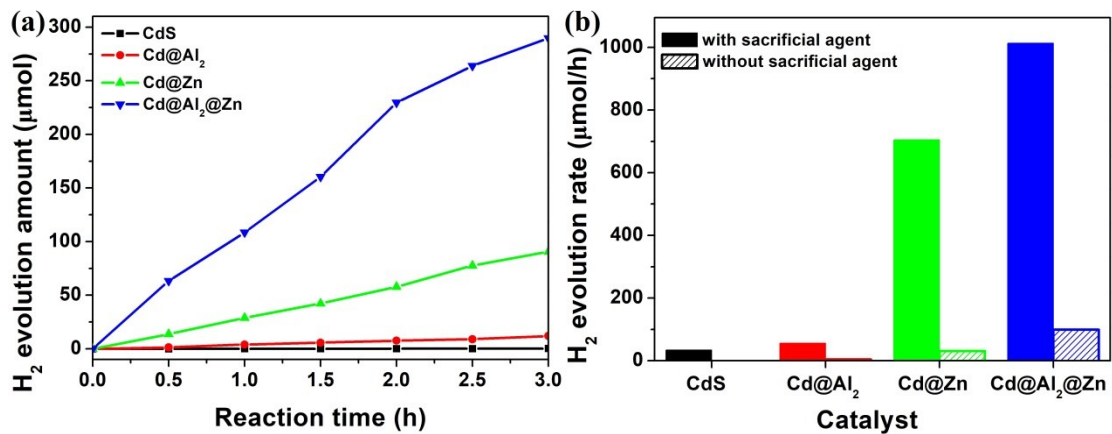

Fig. S13. (a) H<sub>2</sub> evolution amount as a function of time with the absence of sacrificial agent. (b)

Comparison of H<sub>2</sub> evolution rate with and without the addition of extra sacrificial agent.

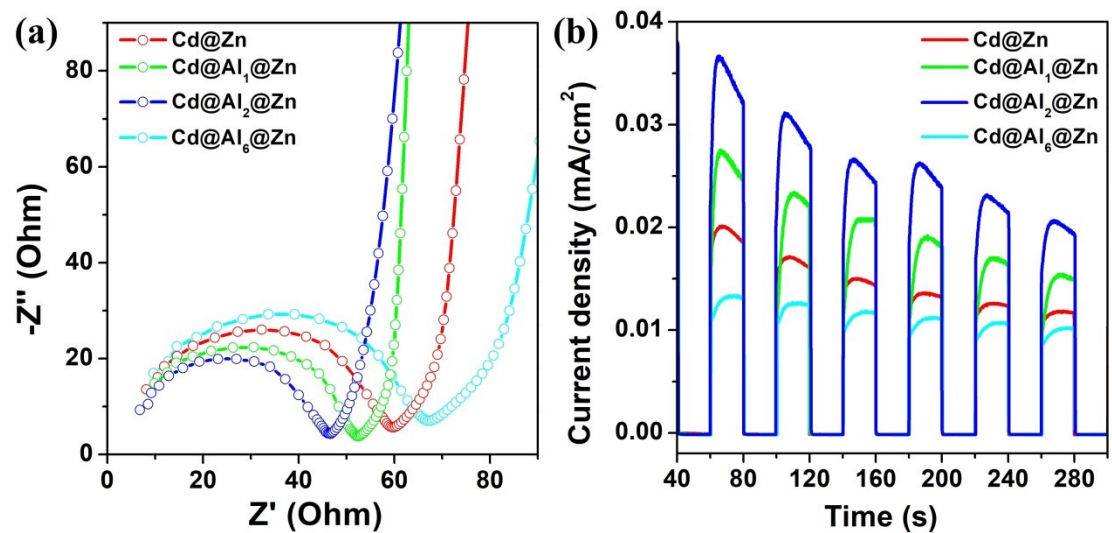

Fig. S14. (a) EIS and (b) Photocurrent-time (i-t) curves of Cd@Al<sub>x</sub>@Zn with different deposition

cycle of Al<sub>2</sub>O<sub>3</sub>.

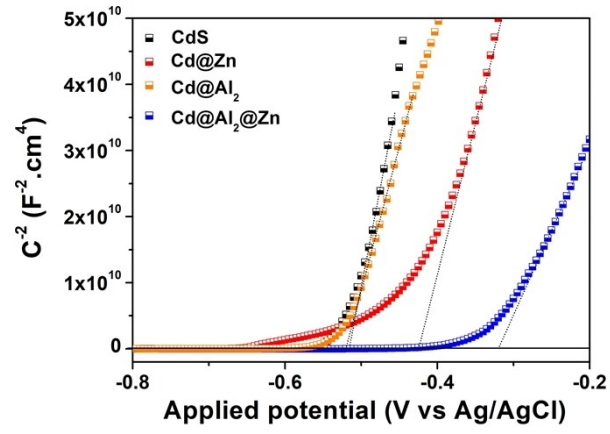

**Fig. S15.** Mott-Schottky plots of CdS, Cd@Zn, Cd@Al<sub>2</sub> and Cd@Al<sub>2</sub>@Zn.

## Tables

**Table S1.** The elemental composition of Cd@Zn and Cd@Al<sub>2</sub>@Zn determined by XPS measurement.

| Sample                 | The elemental composition (%) |       |       |       |       |
|------------------------|-------------------------------|-------|-------|-------|-------|
|                        | Cd                            | Zn    | O     | S     | C     |
| Cd@Zn                  | 19.72                         | 10.11 | 36.6  | 10.58 | 22.99 |
| Cd@Al <sub>2</sub> @Zn | 11.11                         | 19.90 | 34.75 | 11.31 | 22.93 |

**Table S2.** Comparison of different H<sub>2</sub> evolution enhancement strategies over the CdS-ZnO based heterostructure with the addition of cocatalyst.

| <b>catalyst</b>                         | <b>Cocatalyst</b> | <b>light source</b>          | <b><i>R</i>(H<sub>2</sub>) (mmol/g/h)</b> | <b>reference</b> |
|-----------------------------------------|-------------------|------------------------------|-------------------------------------------|------------------|
| CdS@Al <sub>2</sub> O <sub>3</sub> @ZnO | Pt                | 225W Xe lamp                 | 101.3                                     | this work        |
| ZnO-CdS/RGO                             | Pt                | 300W Xe lamp                 | 11.2                                      | [1]              |
| ZnS-CdS/GO                              | Pt                | 300 W Xe lamp                | 16.8                                      | [2]              |
| ZnO/Pt/CdS                              | Pt                | 400W Xe lamp                 | 17.4                                      | [3]              |
| ZnO/CdS/RGO                             | Pt                | 300W Xe lamp                 | 5.9                                       | [4]              |
| ZnO/Pt/CdS                              | Pt                | 400 W Xe lamp                | 6.9                                       | [5]              |
| ZnO-Au-CdS                              | Au                | 300W Xe lamp                 | 0.61                                      | [6]              |
| ZnS/CdS/ZnO                             | Pt                | 225W Xe lamp                 | 44.7                                      | [7]              |
| CdS-Au/ZnO                              | Au                | 300 W Xe lamp                | 2.08                                      | [8]              |
| CdS/Au/ZnO                              | Au                | 300 W Xe lamp, visible light | 5.2                                       | [9]              |
| ZnO-CdS@Cd                              | Pt                | 300 W Xe lamp                | 19.2                                      | [9]              |

**Table S3.** Comparison of the interlayer passivation effect in the utilization of different fields.

| <b>catalyst</b>                                                                         | <b>Cocatalyst</b> | <b>performance enhancement after passivation</b>                     | <b>reference</b> |
|-----------------------------------------------------------------------------------------|-------------------|----------------------------------------------------------------------|------------------|
| CdS@Al <sub>2</sub> O <sub>3</sub> @ZnO                                                 | Pt                | 2.2 times higher photocatalytic H <sub>2</sub> evolution rate        | this work        |
| CdSe/Al <sub>2</sub> O <sub>3</sub> /TiO <sub>2</sub>                                   | --                | 1.2 times higher photoelectrocatalytic H <sub>2</sub> evolution rate | [10]             |
| ITO/NiO/Al <sub>2</sub> O <sub>3</sub> /Si/ZnO/Ag                                       | Ag                | 9 times higher external quantum efficiency of PL                     | [11]             |
| ZnO/Al <sub>2</sub> O <sub>3</sub> /GaN                                                 | Au                | 3 times enhanced turn-on voltage                                     | [12]             |
| n-ZnO/Al <sub>2</sub> O <sub>3</sub> /p-Si                                              | --                | 1.6 times higher PL intensity                                        | [13]             |
| NiCrAlY <sub>3</sub> /Al <sub>2</sub> O <sub>3</sub> /Ti <sub>2</sub> AlNb              | --                | 1.3 times higher critical load                                       | [14]             |
| Graphene/Al <sub>2</sub> O <sub>3</sub> /Si                                             | Au                | 2.3 times higher photo-conversion efficiency                         | [15]             |
| NiO <sub>x</sub> /Al <sub>2</sub> O <sub>3</sub> /n-Si                                  | --                | 7 times higher current density of water oxidation                    | [16]             |
| Au/Al <sub>2</sub> O <sub>3</sub> /TiO <sub>2</sub>                                     | Au                | 7 times higher CO <sub>2</sub> reduction efficiency                  | [17]             |
| TiO <sub>2</sub> /Al <sub>2</sub> O <sub>3</sub> /ZrO <sub>2</sub>                      | --                | 1.3 times higher power conversion efficiency                         | [18]             |
| TiO <sub>2</sub> /Al <sub>2</sub> O <sub>3</sub> /CdS                                   | --                | 1.3 times higher power conversion efficiency                         | [19]             |
| MoS <sub>2</sub> /Al <sub>2</sub> O <sub>3</sub> /g-C <sub>3</sub> N <sub>4</sub>       | --                | 1.65 times higher photocatalytic H <sub>2</sub> evolution rate       | [20]             |
| ITO/ZnO/PC <sub>71</sub> BM                                                             | --                | 3 times higher water oxidation ability                               | [21]             |
| GaAs/ZnO/HfO <sub>2</sub>                                                               | --                | 1.7 times higher capacitance                                         | [22]             |
| FTO/ZnO/TiO <sub>2</sub> /CuInS <sub>2</sub>                                            | --                | 1.2 times higher photovoltaic conversion efficiency                  | [23]             |
| Fe <sub>2</sub> O <sub>3</sub> /Fe <sub>x</sub> Sn <sub>1-x</sub> O <sub>4</sub> /FeOOH | --                | 1.2 times higher photocurrent density                                | [24]             |

**Reference**

- [1] X. Wang, L. Yin and G. Liu, *Chem. Commun.*, 2014, **50**, 3460-3463.
- [2] S. R. Lingampalli, U. K. Gautam, C. N. R. Rao, *Energy Environ. Sci.*, 2013, **6**, 3589-3594.
- [3] X. Wang, X. Yao, *Carbon*, 2014, **77**, 667-674.

- [4] A. Roy, S. R. Lingampalli, S. Saha and C. N. R. Rao, *Chem. Phys. Lett.*, 2015, **637**, 137-142.
- [5] T. Zhuang, Y. Liu, Y. Li, M. Sun, Z. Sun, P. Du, J. Jiang, S. Yu, *Small*, 2017, **13**, 1602629.
- [6] J. Shi, D. Ma, Y. Zou, Z. Fan, J. Shi, L. Cheng, X. Ji, C. Niu, *J. Power Sources*, 2018, **379**, 249-260.
- [7] Z. B. Yu, Y. P. Xie, G. Liu, G. Q. M. Lu, X. L. Ma, H. Cheng, *J. Mater. Chem. A*, 2013, **1**, 2773-2776.
- [8] S. Liang, B. Han, X. Liu, W. Chen, M. Peng, G. Guan, H. Deng, Z. Lin, *J. Alloys. Compounds*, 2018, **754**, 105-113.
- [9] X. Wang, G. Liu, L. Wang, Z. Chen, G. Lu, H. Cheng, *Adv. Energy. Mat.*, 2012, **2**, 42-46.
- [10] Y. Wang, W. Bai, H. Wang, Y. Jiang, S. Han, H. Sun, Y. Li, G. Jiang, Z. Zhao, Q. Dalton *Trans.*, 2017, **46**, 10734-10741.
- [11] S. Zhao, X. Liu, W. Gu, X. Liang, Z. Ni, H. Tan, K. Huang, Y. Yan, X. Yu, M. Xu, X. Pi, D. Yang, *IEEE T. Electron Dev.*, 2018, **2**, 577-583.
- [12] T. Wang, H. Wu, H. Zheng, J. B. Wang, Z. Wang, C. Chen, Y. Xu, C. Liu, *Appl. Phys. Lett.*, 2013, **102**, 141912.
- [13] T. Wang, H. Wu, C. Chen, C. Liu, *Appl. Phys. Lett.*, 2012, **100**, 011901.
- [14] H. Q. Li, Q. M. Wang, S. M. Jiang, J. Ma, J. Gong, C. Sun, *Corros. Sci.*, 2011, **53**, 1097-1106.
- [15] M. A. Rehman, I. Akhtar, W. Choi, K. A. yeshaq, F. S. Hussain, M. A. Shehzad, S. H. Chun, J. Jung, Y. Seo, *Carbon*, 2018, **132**, 157-164.
- [16] M. J. Park, J. Y. Jung, S. M. Shin, J. W. Song, Y. H. Nam, D. Y. Kim, J. H. Lee, *Thin Solid Films*, 2016, **599**, 54-58.



- [17] H. Zhao, X. Zheng, X. Feng, Y. Li, *J. Phys. Chem. C*, 2018, **122**, 18949-18956.
- [18] Y. Xiong, X. Zhu, A. Mei, F. Qin, S. Liu, S. Zhang, Y. Jiang, Y. Zhou, H. Han, *Sol. RRL*, 2018, **2**, 1800002.
- [19] A. E. Roelofs, T. P. Brennan, J. C. Dominguez, C. D. Bailie, G. Y. Margulis, E. T. Hoke, M. D. McGehee, S. F. Bent, *J. Phys. Chem. C*, 2013, **117**, 5584-5592.
- [20] S.V. Prabhakar Vattikuti, *C. Byon, Mater. Res. Bull.*, 2017, **96**, 233-245
- [21] L. Wang, D. Yan, D. W. Shaffer, X. Ye, B. H. Layne, J. J. Concepcion, M. Liu, C. Nam, *Chem. Mater.*, 2018, **30**, 324-335.
- [22] Y. Byun, S. Choi, Y. An, P. C. McIntyre, H. Kim, *ACS Appl. Mater. Interfaces*, 2014, **6**, 10482-10488.
- [23] Z. Peng, Z. Liu, J. Chen, Y. Ren, W. Li, C. Li, J. Chen, *Electrochim. Acta.*, 2019, **299**, 206-212.
- [24] X. Cheng, S. Cao, Y. Huan, Z. Bai, M. Li, H. Wu, R. Zhang, W. Peng, Z. Ji, X. Yan, *Energy Technol.*, 2019, **7**, 1800899.
